# Supplementary material for: Controllable in situ synthesis of BiOBrxI1−x solid solution on reduced graphene oxide with enhanced visible light photocatalytic performance
Source: Royal Society of Chemistry journal article supplement (doi:10.1039/c5ra08416d), 2015-01-01
Supplement: c5ra08416d1.pdf [file c5ra08416d1.pdf]

Electronic Supplementary Information

**Controllable in-situ synthesis of  $\text{BiOBr}_x\text{I}_{1-x}$  solid solution on  
reduced graphene oxide with enhanced visible light  
photocatalytic performance**

Zhichong Yang,<sup>a†</sup> Fuxing Cheng,<sup>a†</sup> Xiaoping Dong<sup>a\*</sup> and Fangming Cui<sup>b\*</sup>

<sup>a</sup>Department of Chemistry, School of Sciences, Zhejiang Sci-Tech University, 928 Second Avenue, Xiasha Higher Education Zone, Hangzhou, 310018, China.

<sup>b</sup>Qian Xuesen laboratory of Space Technology, 104 Youyi Road, Haidian District, Beijing, China.

Email: xpdong@zstu.edu.cn

†These authors contributed equally to this work.

**The measurement of photoluminescence (PL) spectra.**

The photoluminescence (PL) spectra were surveyed by Edinburgh FL/FS900 spectrophotometer.

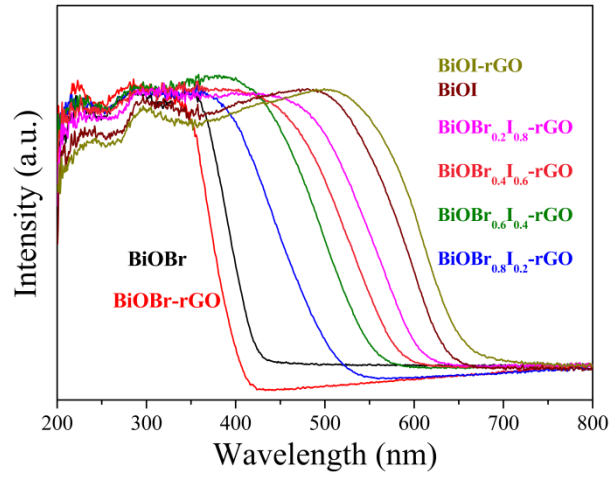

Fig. S1 UV-vis diffuse reflectance spectra of BiOBr<sub>x</sub>I<sub>1-x</sub>-rGO samples, as well as pure BiOBr and BiOI.

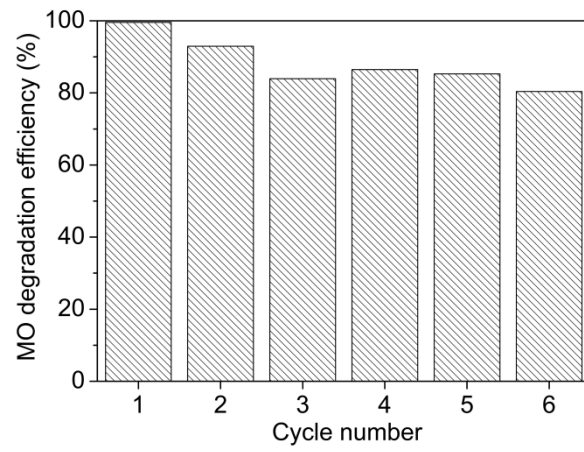

Fig. S2 Cycling runs for the photocatalytic degradation of MO by  $\text{BiOBr}_{0.6}\text{I}_{0.4}\text{-rGO}$  sample under visible light irradiation.

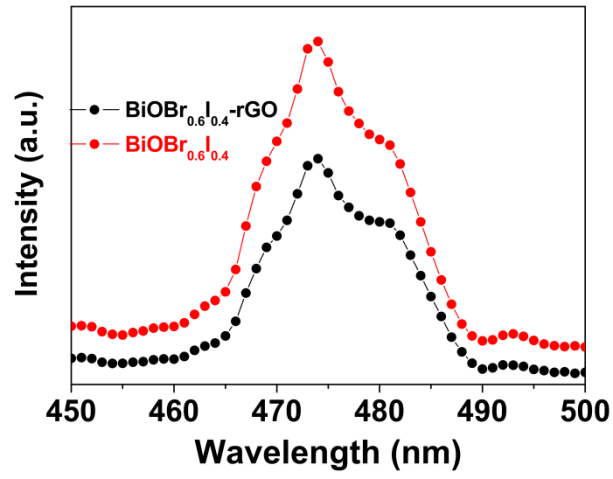

Fig. S3 PL spectra of BiOBr<sub>0.6</sub>I<sub>0.4</sub> and BiOBr<sub>0.6</sub>I<sub>0.4</sub>-rGO at an excitation wavelength of 325 nm.
